# Supplementary material for: One-step synthesis of pentane fuel from γ-valerolactone with high selectivity over a Co/HZSM-5 bifunctional catalyst
Source: Royal Society of Chemistry journal article supplement (doi:10.1039/d1gc01062j), 2021-01-01
Supplement: d1gc01062j1.pdf [file d1gc01062j1.pdf]

## Supporting Information

# **One-Step Synthesis of Pentane Fuel from $\gamma$ - Valerolactone with High Selectivity over Co/HZSM-5 Bifunctional Catalyst**

Hongtao Wang,<sup>†a</sup> Yushan Wu,<sup>†a</sup> Yanzhi Li,<sup>a</sup> Jiebang Peng,<sup>a</sup> Xiang-Kui Gu<sup>\*a</sup> and  
Mingyue Ding<sup>\*a,b</sup>

*<sup>a</sup>School of Power and Mechanical Engineering, the Institute of Technological Sciences,  
Wuhan University, Wuhan 430072, China*

*<sup>b</sup>Shenzhen Research Institute of Wuhan University, Shenzhen 518108, China*

### **Corresponding Author:**

\*E-mail: xiangkuigu@whu.edu.cn (X.K. Gu); dingmy@whu.edu.cn (M. Ding).

## **Experimental Section**

### **Chemical**

$\gamma$ -Valerolactone (GVL, >98%, AR), Tetraethyl orthosilicate (TEOS, 98.6%, AR), Tetrapropylammonium hydroxide (TPAOH, 25%, AR), Aluminum isopropoxide (98%, AR),  $\text{Co}(\text{NO}_3)_2 \cdot 6\text{H}_2\text{O}$  (99%, AR) were purchased from Xilong chemical co., LTD. All of the chemical reagents were directly used as received without further purification.

### **Catalyst characterization**

Surface morphology of samples was measured by Scanning electron microscopy (SEM) using the Scanning Electron Microscope QUANTA F250 instrument made by American FEI company. Fine morphology of catalysts was detected by Transmission electron microscopy (TEM) and X-ray energy dispersive spectroscopy (EDS) on a Titan G260-300 microscope at an extraction voltage of 3950 V. Phase compositions of the powder catalysts were determined by Powder X-ray diffraction (PXRD) with a Smartlab (Rigaku) X-ray diffractometer filtering  $\text{Cu K}\alpha$  radiation ( $\lambda = 1.5405 \text{ \AA}$ ) and assisted by JADE software. Texture properties of catalysts were analyzed by  $\text{N}_2$  adsorption-desorption isotherms using JWBK100B static specific surface analyzer. The specific surface area ( $S_{\text{BET}}$ ) was based on Brunauer-Emmett-Teller (BET) equation, the internal surface area ( $S_{\text{int}}$ ) and the external surface area ( $S_{\text{ext}}$ ) were calculated using the t-plot method, the total pore volume ( $V_{\text{t}}$ ) and the micropore volume ( $V_{\text{mic}}$ ) were assessed according to Barrett-Joyner-Halenda (BJH) method and H-K method, respectively. The pore diameter ( $D_{\text{p}}$ ) was the mean pore diameter of samples. The

density and strength of accessible acidic sites on catalysts were measured by  $\text{NH}_3$ -temperature programmed desorption ( $\text{NH}_3$ -TPD) using a DAS-7000 Instrument (Hunan HUASI) in the temperature range of 100 °C to 800 °C at a heating rate of 10 °C/min. Acid types of catalysts were determined by Pyridine adsorption infrared spectroscopy (Py-IR) using a Bruker VERTEX spectrometer. The reducibility of catalysts was analyzed by  $\text{H}_2$ -temperature programmed reduction ( $\text{H}_2$ -TPR) from 50 °C to 800 °C using the same machine and heating rate as that for  $\text{NH}_3$ -TPD. Cu valence states of catalysts were examined by X-ray photoelectron spectroscopy (XPS) on a Thermal XPS ESCALAB 250Xi Spectrometer. Thermogravimetric analysis (TG) was carried out on METTLER TGA/DSC in the temperature range of 50 to 900 °C at a heating rate of 10 °C/min.

### Catalytic test

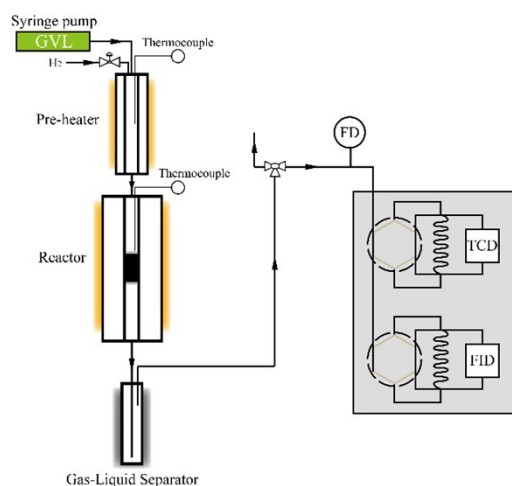

**Fig. S1** The schematic diagram of continuous fixed-bed catalytic system.

The schematic diagram of the continuous fixed-bed catalytic system for the direct synthesis of pentane fuel from GVL was shown in Fig. S1. Typically, 0.5 g Co/HZSM-5 catalyst was loaded in the center of stainless steel tubular Reactor (300 mm length, 11

mm i.d.) between two end-plugs of quartz wool, which was pre-reduced by H<sub>2</sub> (60 mL/min) for 4 h at 400 °C, and then cooled down to the specified reaction temperature. After the reactor system was pressurized to the specified value and reached a stable state, GVL was continuously fed into Reactor through gasification process in Pre-heater. Liquid products were collected in Gas-Liquid Separator (0 °C) after condensation, which were identified by GC-MS (Agilent 5975C/7890A) and quantified by a gas chromatograph (FULI GC 97) with RB-5 capillary column. Gaseous products were detected online by a gas chromatograph (FULI GC 97) equipped with a thermal conductivity detector (TCD) and a flame ionization detector (FID). Porapak Q and 5A MolSieve packed column were connected to TCD, while RB-PLOT Al<sub>2</sub>O<sub>3</sub> capillary column was connected to FID. In addition, the contents of gaseous products were determined by the external standard method calibrated by the standard gas. The contents of liquid products were analyzed using calibration curves, with dichloromethane as internal standard. In general, the total carbon balance difference was within 5%.

GVL conversion, selectivity and yield of pentane were calculated using the equations as follow:

$$GVL\ conversion(C_{GVL}, mol\%) = \frac{mols\ of\ carbon_{GVL,in} - mols\ of\ carbon_{GVL,out}}{mols\ of\ carbon_{GVL,in}} \times 100\%$$

$$Pentane\ selectivity(S_{pentane}, mol\%) = \frac{mols\ of\ carbon\ of\ pentane}{mols\ of\ total\ carbon\ converted\ GVL\ feed} \times 100\%$$

$$Pentane\ yield(Y_{pentane}, mol\%) = \frac{mols\ of\ carbon\ of\ pentane}{mols\ of\ total\ carbon\ of\ GVL\ feed} \times 100\%$$

$$Pentane\ yield(Y_{pentane}, mol\%) = C_{GVL} \times S_{pentane}$$

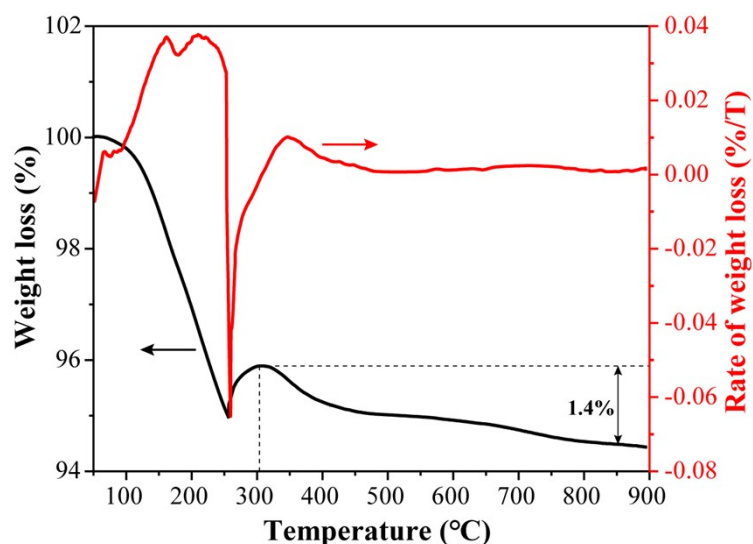

**Fig. S2** TG-DTG analysis of the spent 20Co/HZ5 (80) catalyst after 100 h on stream.

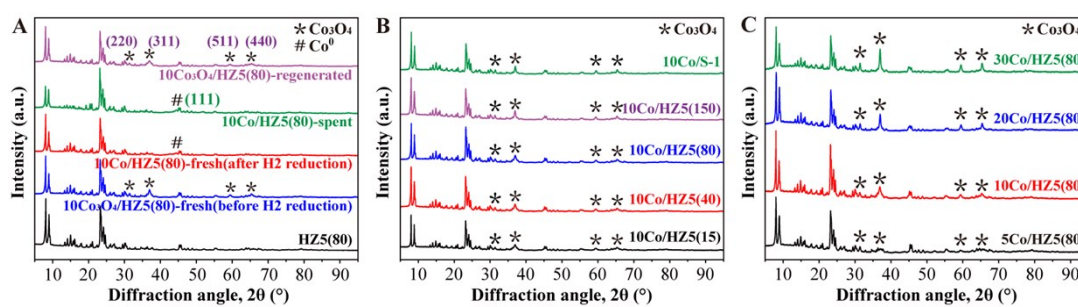

**Fig. S3** PXRD patterns of Co/HZSM-5 catalysts with (A) samples before and after catalytic reaction, (B) different SAR and (C) different Co loading content.

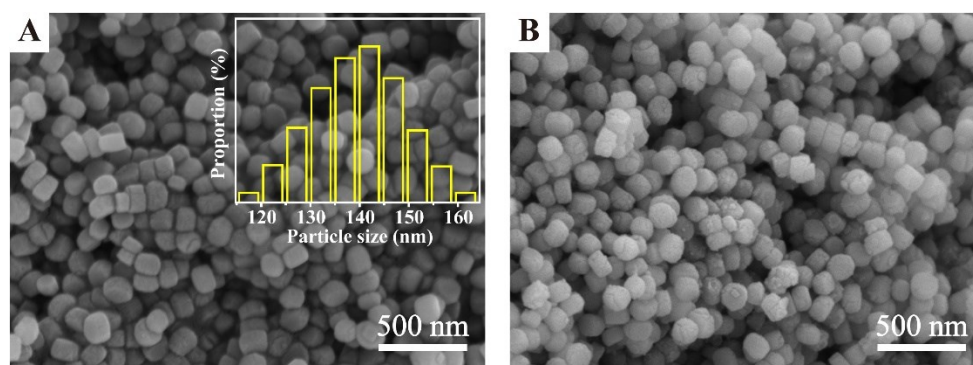

**Fig. S4** (A) SEM image of HZ5 (80) zeolite. Inset is its particle sizes distribution. (B) SEM image of 20Co/HZ5 (80) sample.

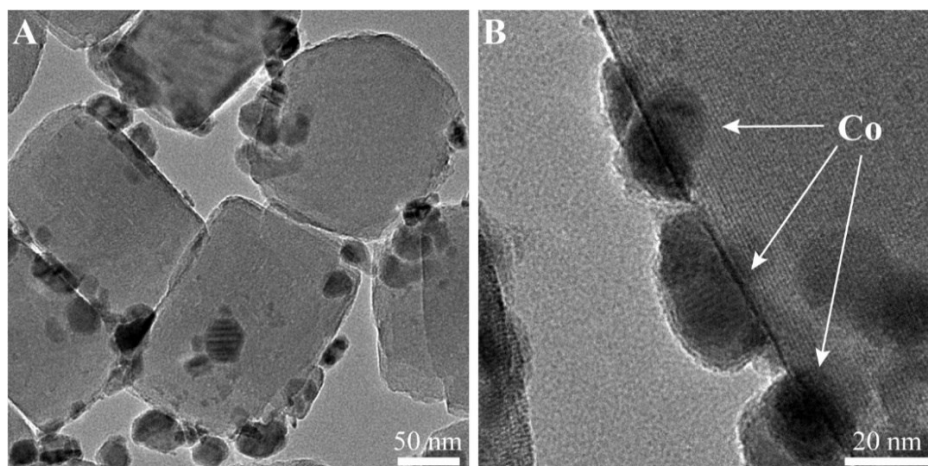

**Fig. S5** TEM images of the spent 20Co/HZ5 (80) catalyst after 100 h on stream.

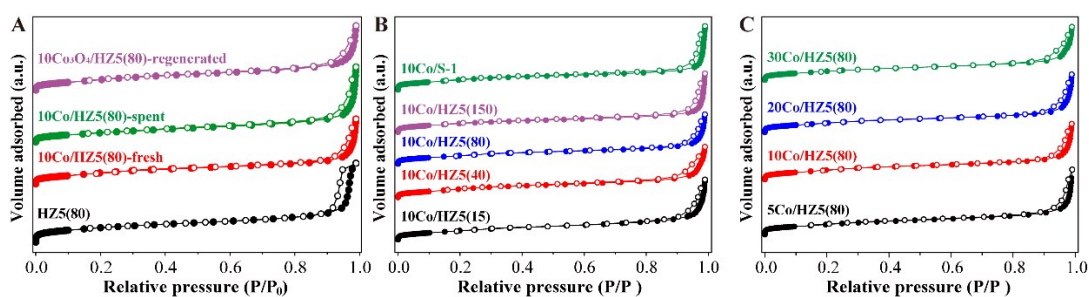

**Fig. S6**  $N_2$  adsorption-desorption isotherms of Co/HZSM-5 catalysts with (A) samples before and after catalytic reaction, (B) different SAR and (C) different Co loading content.

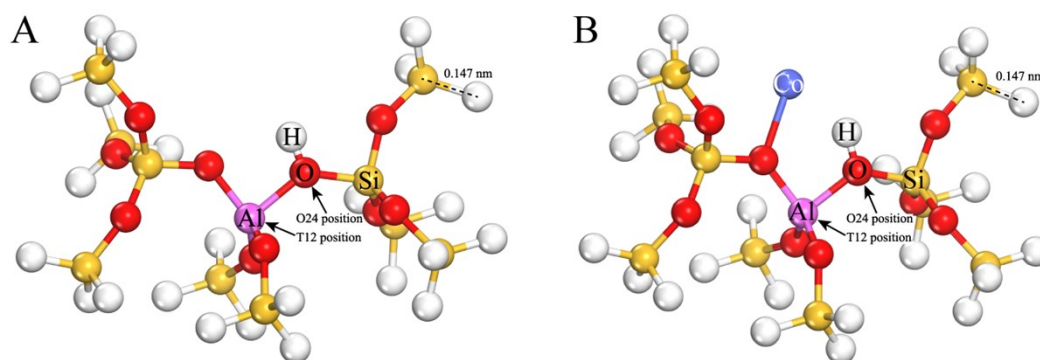

**Fig. S7** (A) 11T cluster model of HZSM-5. (B) The model of Co/HZSM-5.

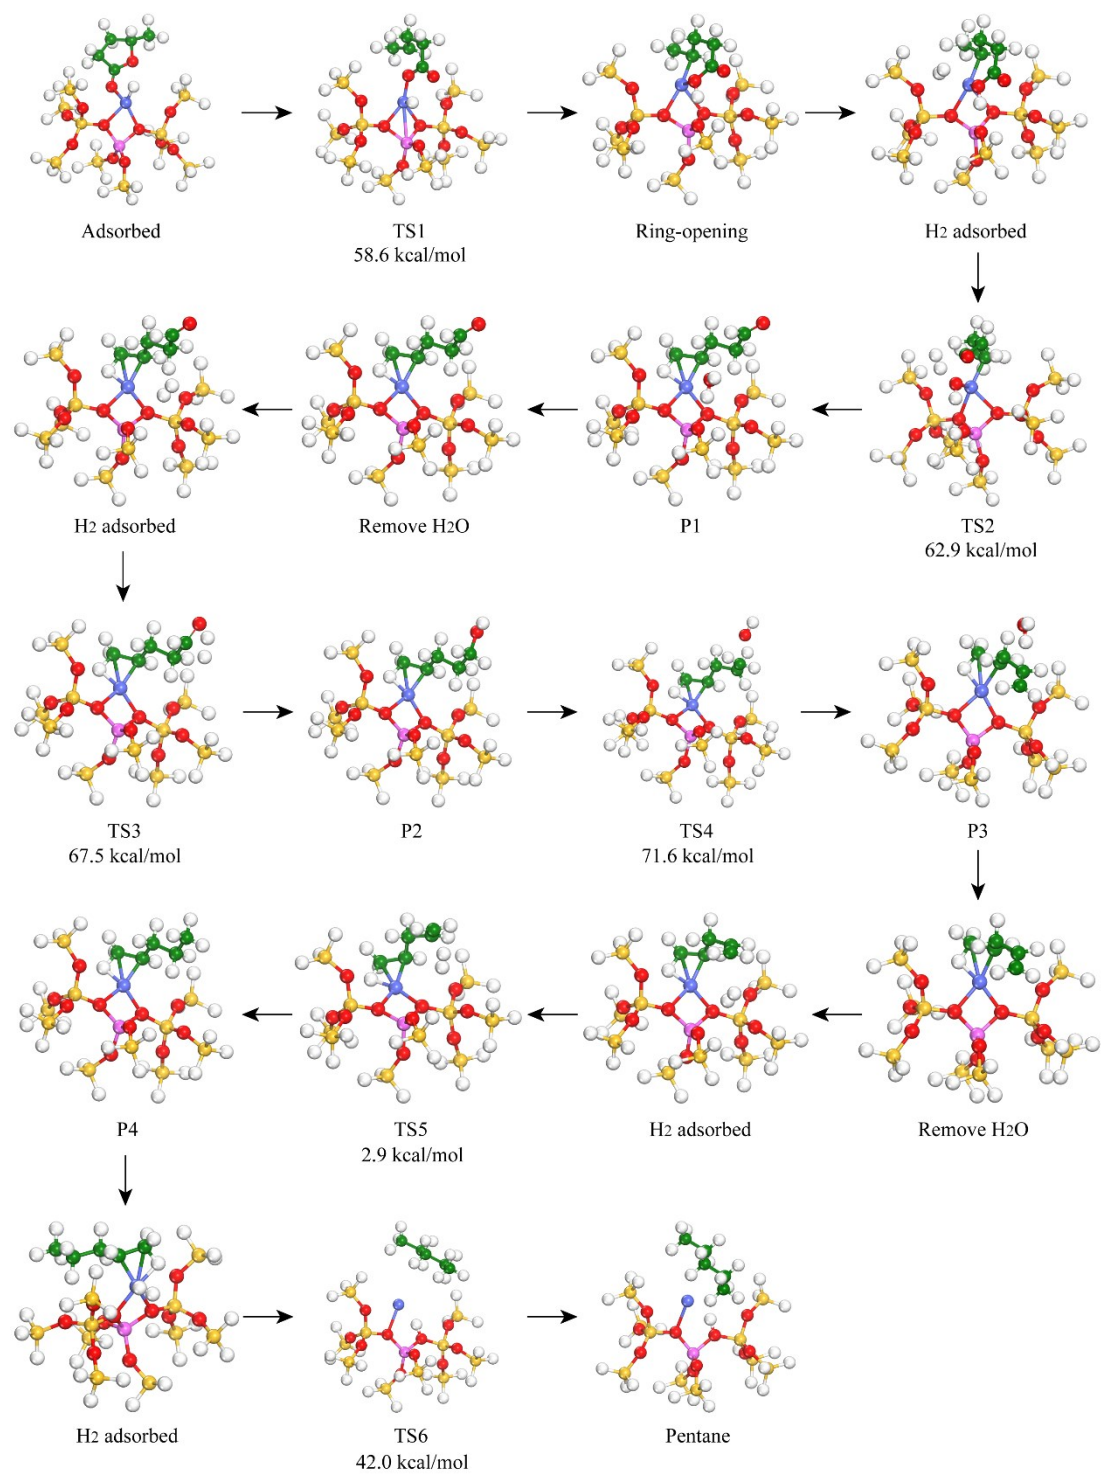

**Fig. S8** Elementary reaction simulation for the formation of pentane from the cleavage of C4-O1 bond in GVL on Co/HZSM-5.



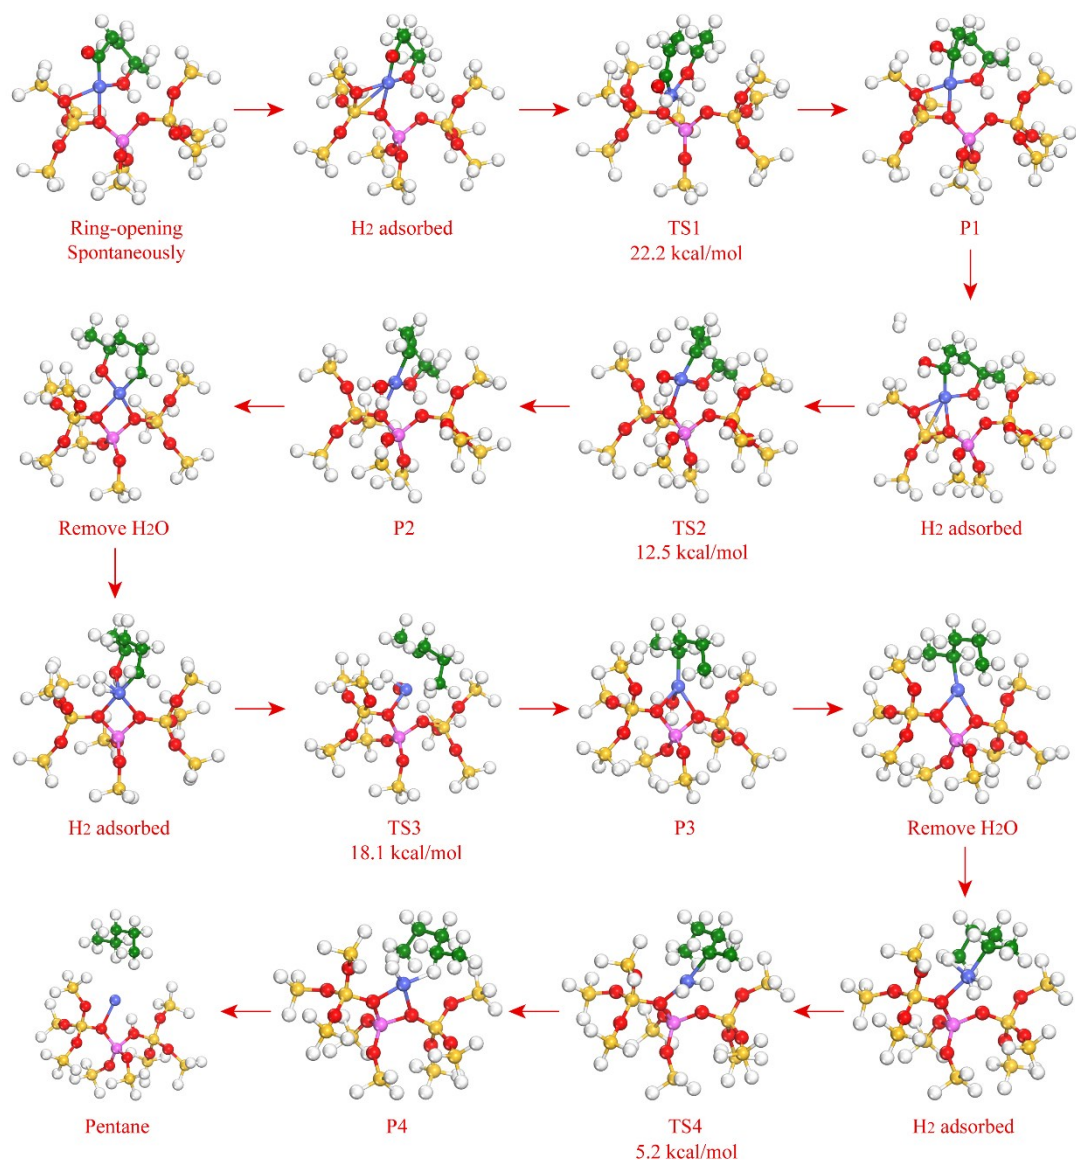

**Fig. S9** Elementary reaction simulation for the formation of pentane from the cleavage of C1-O1 bond in GVL on Co/HZSM-5.



**Table S1.** Catalytic performance for GVL to pentane over 10Co/HZ5 (SAR) catalysts with different Si/Al molar ratios<sup>a</sup>.

| SAR                                 | 15               | 40               | 80               | 150              | S-1               |
|-------------------------------------|------------------|------------------|------------------|------------------|-------------------|
| $C_{\text{GVL}}$                    | 79.9             | 83.3             | 87.7             | 74.9             | 90.7              |
| $S_{\text{Pentane}}$                | 73.4             | 79.1             | 83.6             | 67.7             | 1.8               |
| $Y_{\text{Pentane}}$                | 58.6             | 65.9             | 73.3             | 50.7             | 1.6               |
| <b>Full components analysis (%)</b> |                  |                  |                  |                  |                   |
| Non-hydrocarbon products            |                  |                  |                  |                  |                   |
| butanol                             | 0.0              | 0.0              | 0.0              | 0.0              | 7.5               |
| 2-methyltetrahydrofuran             | 0.2              | 0.5              | 1.1              | 7.7              | 63.1              |
| pentanoic acid                      | 14.9             | 10.6             | 7.0              | 13.1             | 0.0               |
| pentanol                            | 0.6 <sup>b</sup> | 0.5 <sup>b</sup> | 0.7 <sup>b</sup> | 0.8 <sup>b</sup> | 21.1 <sup>c</sup> |
| pentyl valerate                     | 4.9              | 3.6              | 2.4              | 4.6              | 0.0               |
| Hydrocarbon products                |                  |                  |                  |                  |                   |
| CH <sub>4</sub>                     | 0.3              | 0.2              | 0.3              | 0.2              | 3.6               |
| C <sub>2-4</sub> <sup>0</sup>       | 0.6              | 1.0              | 1.2              | 0.6              | 2.9               |
| C <sub>2-4</sub> <sup>=</sup>       | 0.0              | 0.0              | 0.0              | 0.1              | 0.0               |
| C <sub>5</sub> <sup>0</sup>         | 73.4             | 79.1             | 83.6             | 67.7             | 1.8               |
| C <sub>5</sub> <sup>=</sup>         | 5.1              | 4.5              | 3.7              | 5.2              | 0.0               |

<sup>a</sup> Reaction conditions: T = 200 °C, P = 1.0 MPa, WHSV = 0.6 h<sup>-1</sup>, Flow of carrier gas H<sub>2</sub> = 60 mL·min<sup>-1</sup>, Time = 5 h. <sup>b</sup> Corresponding to 1-pentanol. <sup>c</sup> Corresponding to 2-pentanol.

**Table S2.** Catalytic performance of contrast experiments with 10Cu/S-1 to 10Co/S-1 catalysts at different temperature<sup>a</sup>.

| Sample/Temperature (°C)             | 10Cu/S-1          |                   |                   | 10Co/S-1          |                  |                  |
|-------------------------------------|-------------------|-------------------|-------------------|-------------------|------------------|------------------|
|                                     | 200               | 250               | 280               | 200               | 250              | 280              |
| C <sub>GVL</sub>                    | 17.0              | 26.8              | 52.1              | 88.3              | 99.9             | 99.7             |
| S <sub>Pentane</sub>                | 0.0               | 0.1               | 0.1               | 5.7               | 4.2              | 2.0              |
| Y <sub>Pentane</sub>                | 0.0               | 0.0               | 0.1               | 5.0               | 4.2              | 2.0              |
| <b>Full components analysis (%)</b> |                   |                   |                   |                   |                  |                  |
| <b>Non-hydrocarbon products</b>     |                   |                   |                   |                   |                  |                  |
| ethanol                             | 7.9               | 11.9              | 0.5               | 3.1               | 22.1             | 24.3             |
| butanol                             | 1.8               | 0.8               | 0.5               | 9.9               | 0.8              | 0.0              |
| 2-methyltetrahydrofuran             | 19.4              | 7.2               | 5.1               | 25.3              | 0.5              | 0.0              |
| pentanoic acid                      | 59.2              | 58.1              | 53.6              | 0.1               | 0.1              | 0.3              |
| pentanol                            | 10.4 <sup>b</sup> | 17.2 <sup>b</sup> | 27.7 <sup>b</sup> | 11.4 <sup>c</sup> | 0.4 <sup>c</sup> | 0.0 <sup>c</sup> |
| pentyl valerate                     | 0.4               | 1.9               | 8.2               | 0.0               | 0.1              | 0.0              |
| others                              | 0.1               | 1.0               | 3.0               | 3.3               | 0.1              | 0.1              |
| <b>Hydrocarbon products</b>         |                   |                   |                   |                   |                  |                  |
| CH <sub>4</sub>                     | 0.0               | 0.0               | 0.0               | 26.9              | 53.5             | 60.4             |
| C <sub>2-4</sub> <sup>0</sup>       | 0.0               | 0.1               | 0.0               | 13.7              | 18.2             | 12.9             |
| C <sub>2-4</sub> <sup>=</sup>       | 0.2               | 0.4               | 0.3               | 0.3               | 0.0              | 0.0              |
| C <sub>5</sub> <sup>0</sup>         | 0.0               | 0.1               | 0.1               | 5.7               | 4.2              | 2.0              |
| C <sub>5</sub> <sup>=</sup>         | 0.6               | 1.3               | 1.0               | 0.3               | 0.0              | 0.0              |

<sup>a</sup> Reaction conditions: P = 0.1 MPa, WHSV = 0.6 h<sup>-1</sup>, Flow of carrier gas H<sub>2</sub> = 60 mL·min<sup>-1</sup>, Time = 5 h. <sup>b</sup> Corresponding to 1-pentanol. <sup>c</sup> Corresponding to 2-pentanol.

**Table S3.** Catalytic performance for GVL to pentane over Co/HZ5 (80) catalysts with different Co loading content<sup>a</sup>.

| Loading content (wt.%)        | 0    | 5    | 10   | 20   | 30   |
|-------------------------------|------|------|------|------|------|
| C <sub>GVL</sub>              | 38.5 | 58.7 | 87.7 | 99.5 | 99.8 |
| S <sub>Pentane</sub>          | 0.2  | 43.4 | 83.6 | 90.8 | 85.6 |
| Y <sub>Pentane</sub>          | 0.1  | 25.5 | 73.3 | 90.3 | 85.4 |
| Full components analysis (%)  |      |      |      |      |      |
| Non-hydrocarbon products      |      |      |      |      |      |
| 2-methyltetrahydrofuran       | 0.0  | 5.6  | 1.1  | 0.7  | 0.3  |
| pentanoic acid                | 68.8 | 31.6 | 7.0  | 0.1  | 0.0  |
| 1-pentanol                    | 0.1  | 1.3  | 0.7  | 0.4  | 0.4  |
| pentyl valerate               | 0.0  | 9.7  | 2.4  | 0.1  | 0.0  |
| Hydrocarbon products          |      |      |      |      |      |
| CH <sub>4</sub>               | 0.1  | 0.2  | 0.3  | 2.3  | 4.1  |
| C <sub>2-4</sub> <sup>0</sup> | 0.7  | 0.6  | 1.2  | 5.5  | 9.6  |
| C <sub>2-4</sub> <sup>=</sup> | 17.5 | 0.1  | 0.0  | 0.0  | 0.0  |
| C <sub>5</sub> <sup>0</sup>   | 0.2  | 43.4 | 83.6 | 90.8 | 85.6 |
| C <sub>5</sub> <sup>=</sup>   | 6.1  | 7.5  | 3.7  | 0.1  | 0.0  |
| C <sub>5+</sub>               | 6.5  | 0.0  | 0.0  | 0.0  | 0.0  |

<sup>a</sup> Reaction conditions: T = 200 °C, P = 1.0 MPa, WHSV = 0.6 h<sup>-1</sup>, Flow of carrier gas H<sub>2</sub> = 60 mL·min<sup>-1</sup>, Time = 5 h.

**Table S4.** Catalytic performance for GVL to pentane over 20Co/HZ5 (80) catalyst with different temperature<sup>a</sup>.

| Temperature (°C)                    | 170  | 185  | 200  | 215  | 230  |
|-------------------------------------|------|------|------|------|------|
| C <sub>GVL</sub>                    | 71.1 | 91.8 | 99.5 | 99.8 | 99.9 |
| S <sub>Pentane</sub>                | 31.8 | 59.0 | 90.8 | 81.4 | 66.6 |
| Y <sub>Pentane</sub>                | 22.6 | 54.2 | 90.3 | 81.2 | 66.5 |
| <b>Full components analysis (%)</b> |      |      |      |      |      |
| Non-hydrocarbon products            |      |      |      |      |      |
| 2-methyltetrahydrofuran             | 55.2 | 33.1 | 0.7  | 0.1  | 0.0  |
| pentanoic acid                      | 0.7  | 0.5  | 0.1  | 0.0  | 0.1  |
| 1-pentanol                          | 3.9  | 1.1  | 0.4  | 0.0  | 0.2  |
| pentyl valerate                     | 6.8  | 2.9  | 0.1  | 0.0  | 0.0  |
| Hydrocarbon products                |      |      |      |      |      |
| CH <sub>4</sub>                     | 0.3  | 0.7  | 2.3  | 7.4  | 13.7 |
| C <sub>2-4</sub> <sup>0</sup>       | 0.8  | 2.3  | 5.5  | 11.1 | 19.4 |
| C <sub>2-4</sub> <sup>=</sup>       | 0.0  | 0.0  | 0.0  | 0.0  | 0.0  |
| C <sub>5</sub> <sup>0</sup>         | 31.8 | 59.0 | 90.8 | 81.4 | 66.6 |
| C <sub>5</sub> <sup>=</sup>         | 0.5  | 0.4  | 0.1  | 0.0  | 0.0  |

<sup>a</sup> Reaction conditions: P = 1.0 MPa, WHSV = 0.6 h<sup>-1</sup>, Flow of carrier gas H<sub>2</sub> = 60 mL·min<sup>-1</sup>, Time = 5 h.

**Table S5.** Catalytic performance for GVL to pentane over 20Co/HZ5 (80) catalyst with different pressure<sup>a</sup>.

| Pressure (MPa)                      | 0.1  | 0.5  | 1.0  | 1.5  | 2.0  |
|-------------------------------------|------|------|------|------|------|
| C <sub>GVL</sub>                    | 94.4 | 97.9 | 99.5 | 99.6 | 99.7 |
| S <sub>Pentane</sub>                | 34.7 | 64.3 | 90.8 | 84.6 | 67.3 |
| Y <sub>Pentane</sub>                | 22.6 | 54.2 | 90.3 | 81.2 | 66.5 |
| <b>Full components analysis (%)</b> |      |      |      |      |      |
| Non-hydrocarbon products            |      |      |      |      |      |
| 2-methyltetrahydrofuran             | 4.4  | 1.4  | 0.7  | 4.8  | 16.2 |
| pentanoic acid                      | 1.3  | 0.1  | 0.1  | 0.0  | 0.1  |
| 1-pentanol                          | 2.1  | 1.1  | 0.4  | 5.4  | 11.9 |
| pentyl valerate                     | 0.3  | 0.1  | 0.1  | 0.0  | 0.8  |
| Hydrocarbon products                |      |      |      |      |      |
| CH <sub>4</sub>                     | 26.1 | 13.5 | 2.3  | 1.2  | 0.8  |
| C <sub>2-4</sub> <sup>0</sup>       | 29.7 | 19.4 | 5.5  | 4.0  | 2.9  |
| C <sub>2-4</sub> <sup>=</sup>       | 0.5  | 0.0  | 0.0  | 0.0  | 0.0  |
| C <sub>5</sub> <sup>0</sup>         | 34.7 | 64.3 | 90.8 | 84.6 | 67.3 |
| C <sub>5</sub> <sup>=</sup>         | 0.9  | 0.1  | 0.1  | 0.0  | 0.0  |

<sup>a</sup>Reaction conditions: T = 200 °C, WHSV = 0.6 h<sup>-1</sup>, Flow of carrier gas H<sub>2</sub> = 60 mL·min<sup>-1</sup>, Time = 5 h.

**Table S6.** Catalytic performance for GVL to pentane over 20Co/HZ5 (80) catalyst with different WHSV of GVL<sup>a</sup>.

| WHSV (h <sup>-1</sup> )             | 0.08 | 0.15 | 0.3  | 0.6  | 1.0  |
|-------------------------------------|------|------|------|------|------|
| C <sub>GVL</sub>                    | 99.9 | 99.9 | 99.9 | 99.5 | 90.6 |
| S <sub>Pentane</sub>                | 83.2 | 89.9 | 93.5 | 90.8 | 75.4 |
| Y <sub>Pentane</sub>                | 83.8 | 89.8 | 93.2 | 90.3 | 59.1 |
| <b>Full components analysis (%)</b> |      |      |      |      |      |
| Non-hydrocarbon products            |      |      |      |      |      |
| 2-methyltetrahydrofuran             | 0.0  | 0.0  | 0.1  | 0.7  | 8.3  |
| pentanoic acid                      | 0.0  | 0.0  | 0.0  | 0.1  | 0.1  |
| 1-pentanol                          | 0.0  | 0.0  | 0.1  | 0.4  | 3.7  |
| pentyl valerate                     | 0.0  | 0.0  | 0.0  | 0.1  | 0.1  |
| Hydrocarbon products                |      |      |      |      |      |
| CH <sub>4</sub>                     | 6.1  | 3.1  | 1.4  | 2.3  | 4.3  |
| C <sub>2-4</sub> <sup>0</sup>       | 10.7 | 6.9  | 4.9  | 5.5  | 8.0  |
| C <sub>2-4</sub> <sup>=</sup>       | 0.0  | 0.0  | 0.0  | 0.0  | 0.0  |
| C <sub>5</sub> <sup>0</sup>         | 83.2 | 89.9 | 93.5 | 90.8 | 75.4 |
| C <sub>5</sub> <sup>=</sup>         | 0.0  | 0.0  | 0.0  | 0.1  | 0.1  |

<sup>a</sup> Reaction conditions: T = 200 °C, P = 1.0 MPa, Flow of carrier gas H<sub>2</sub> = 60 mL·min<sup>-1</sup>, Time = 5 h.



**Table S7.** Comparison of fuels components selectivity and catalytic activity as well as reaction conditions with the previous reports.

| Entry | Catalysts                                                                                                       | Reactor      | Reaction conditions and catalytic activity |             |                            |                  |                                          |                   | Ref. <sup>a</sup> |
|-------|-----------------------------------------------------------------------------------------------------------------|--------------|--------------------------------------------|-------------|----------------------------|------------------|------------------------------------------|-------------------|-------------------|
|       |                                                                                                                 |              | T<br>(°C)                                  | P<br>(MPa)  | WHSV<br>(h <sup>-1</sup> ) | GVL conv.<br>(%) | Fuel components                          | Fuels sel.<br>(%) |                   |
| 1     | SiO <sub>2</sub> /Al <sub>2</sub> O <sub>3</sub> ( I ) +                                                        | Dual-bed     | 375 ( I )                                  | 3.6         | 0.22                       | 99               | C <sub>8</sub> -C <sub>16</sub> alkenes  | 60.0              | Ref 16            |
|       | Amberlyst-70 ( II )                                                                                             |              | 170 ( II )                                 |             |                            |                  |                                          |                   |                   |
| 2     | Pd/Nb <sub>2</sub> O <sub>5</sub> ( I ) +                                                                       | Multiple     | 325 ( I )                                  | 1.4 ( I )   | 0.72                       | 96               | C <sub>18</sub> -C <sub>27</sub> alkanes | ~ 65              | Ref 17            |
|       | Ce <sub>0.5</sub> Zr <sub>0.5</sub> O <sub>2</sub> ( II ) +                                                     |              | 425 ( II )                                 | 1.4 ( II )  |                            |                  |                                          |                   |                   |
|       | Ru/C ( III ) +                                                                                                  |              | 150 ( III )                                | 4.0 ( III ) |                            |                  |                                          |                   |                   |
|       | Amberlyst-70 ( IV ) +                                                                                           |              | 140 ( IV )                                 | 0.1 ( IV )  |                            |                  |                                          |                   |                   |
| 3     | Ru/C ( V )                                                                                                      | Dual-batch   | 160 ( V )                                  | 0.1 ( V )   | --                         | 99               | Gasoline                                 | ~ 80              | Ref 18            |
|       | SiO <sub>2</sub> /Al <sub>2</sub> O <sub>3</sub> ( I ) +                                                        |              | 350 ( I )                                  | 0.1 ( I )   |                            |                  |                                          |                   |                   |
|       | [CF <sub>3</sub> CH <sub>2</sub> OH <sub>2</sub> ][CF <sub>3</sub> CH <sub>2</sub> OBF <sub>3</sub> ]<br>( II ) |              | 10 ( II )                                  | 0.1 ( II )  |                            |                  |                                          |                   |                   |
| 4     | 100% H <sub>3</sub> PO <sub>4</sub>                                                                             | Single-batch | 240                                        | 0.1         | --                         | 99               | Aromatics                                | 33.5              | Ref 12            |
| 5     | HZSM-5                                                                                                          | Single-bed   | 500                                        | 0.1         | 2.0                        | 99               | Aromatics                                | 56.7              | Ref 13            |
| 6     | Pd/HY                                                                                                           | Single-batch | 260                                        | 8.0         | --                         | 99               | Pentyl valerate                          | 60.6              | Ref 14            |
| 7     | Pt/HZSM-5                                                                                                       | Single-bed   | 250                                        | 1.0         | 2.0                        | 60               | Pentyl valerate                          | ~ 80              | Ref 15            |
| 8     | Pd/HY                                                                                                           | Single-batch | 280                                        | 4.0         | --                         | 99               | Pentane                                  | 23.1              | Ref 14            |
| 9     | Co/HZSM-5                                                                                                       | Single-bed   | 200                                        | 1.0         | 0.3                        | 99.9             | Pentane                                  | 93.5              | This work         |

<sup>a</sup> Corresponding to the References in the Manuscript.

**Table S8.** Textural properties of 10Co/HZ5 (80) catalysts before and after catalytic reaction with different Co species.

| Samples                  | Surface area<br>(m <sup>2</sup> ·g <sup>-1</sup> ) |                  |                  |                               | Pore volume<br>(cm <sup>3</sup> ·g <sup>-1</sup> ) |                  | Pore diameter<br>(nm) |
|--------------------------|----------------------------------------------------|------------------|------------------|-------------------------------|----------------------------------------------------|------------------|-----------------------|
|                          | S <sub>BET</sub>                                   | S <sub>int</sub> | S <sub>ext</sub> | R <sub>ext</sub> <sup>a</sup> | V <sub>t</sub>                                     | V <sub>mic</sub> | D <sub>p</sub>        |
| HZ5(80)                  | 474.8                                              | 367.1            | 107.7            | 0.227                         | 0.49                                               | 0.19             | 4.14                  |
| 10Co/HZ5(80)-fresh       | 407.2                                              | 311.2            | 96.0             | 0.236                         | 0.42                                               | 0.16             | 4.10                  |
| 10Co/HZ5(80)-spent       | 335.6                                              | 230.6            | 105.0            | 0.313                         | 0.34                                               | 0.13             | 5.23                  |
| 10Co/HZ5(80)-regenerated | 390.5                                              | 291.6            | 98.9             | 0.253                         | 0.41                                               | 0.16             | 4.20                  |

<sup>a</sup> R<sub>ext</sub>, external specific surface area (S<sub>ext</sub>) / total specific surface area (S<sub>BET</sub>).

**Table S9.** Textural properties of 10Co/HZ5 (SAR) catalysts with different SAR.

| Samples       | Surface area<br>(m <sup>2</sup> ·g <sup>-1</sup> ) |                  |                  |                               | Pore volume<br>(cm <sup>3</sup> ·g <sup>-1</sup> ) |                  | Pore diameter<br>(nm) |
|---------------|----------------------------------------------------|------------------|------------------|-------------------------------|----------------------------------------------------|------------------|-----------------------|
|               | S <sub>BET</sub>                                   | S <sub>int</sub> | S <sub>ext</sub> | R <sub>ext</sub> <sup>a</sup> | V <sub>t</sub>                                     | V <sub>mic</sub> | D <sub>p</sub>        |
| 10Co/HZ5(15)  | 402.1                                              | 290.8            | 111.3            | 0.277                         | 0.47                                               | 0.16             | 4.72                  |
| 10Co/HZ5(40)  | 400.3                                              | 291.3            | 108.9            | 0.272                         | 0.42                                               | 0.16             | 4.22                  |
| 10Co/HZ5(80)  | 407.2                                              | 311.2            | 96.0             | 0.236                         | 0.42                                               | 0.16             | 4.10                  |
| 10Co/HZ5(150) | 418.6                                              | 324.6            | 94.0             | 0.225                         | 0.47                                               | 0.17             | 4.53                  |
| 10Co/S-1      | 423.2                                              | 320.6            | 102.5            | 0.242                         | 0.50                                               | 0.17             | 4.72                  |

<sup>a</sup> R<sub>ext</sub>, external specific surface area (S<sub>ext</sub>) / total specific surface area (S<sub>BET</sub>).

**Table S10.** Textural properties of Co/HZ5 (80) catalysts with different Co content.

| Samples      | Surface area<br>(m <sup>2</sup> ·g <sup>-1</sup> ) |                  |                  |                               | Pore volume<br>(cm <sup>3</sup> ·g <sup>-1</sup> ) |                  | Pore diameter<br>(nm) |
|--------------|----------------------------------------------------|------------------|------------------|-------------------------------|----------------------------------------------------|------------------|-----------------------|
|              | S <sub>BET</sub>                                   | S <sub>int</sub> | S <sub>ext</sub> | R <sub>ext</sub> <sup>a</sup> | V <sub>t</sub>                                     | V <sub>mic</sub> | D <sub>p</sub>        |
| 5Co/HZ5(80)  | 399.8                                              | 297.5            | 102.3            | 0.256                         | 0.46                                               | 0.16             | 4.59                  |
| 10Co/HZ5(80) | 407.2                                              | 311.2            | 96.0             | 0.236                         | 0.42                                               | 0.16             | 4.10                  |
| 20Co/HZ5(80) | 387.4                                              | 289.9            | 97.6             | 0.252                         | 0.42                                               | 0.15             | 4.34                  |
| 30Co/HZ5(80) | 368.6                                              | 270.7            | 98.0             | 0.266                         | 0.39                                               | 0.15             | 4.24                  |

<sup>a</sup> R<sub>ext</sub>, external specific surface area (S<sub>ext</sub>) / total specific surface area (S<sub>BET</sub>).

**Table S11.** Reduction and acidic properties of 10Co/HZ5 (SAR) catalysts with different Si/Al molar ratios.

| Samples       | H <sub>2</sub> -TPR |                                   |                                  | NH <sub>3</sub> -TPD                     |        |
|---------------|---------------------|-----------------------------------|----------------------------------|------------------------------------------|--------|
|               | Top temp.<br>(°C)   | H <sub>2</sub> uptake<br>(μmol/g) | Reducibility<br>(%) <sup>a</sup> | Acid strength<br>(μmol·g <sup>-1</sup> ) |        |
|               | Peak I / II         | Peak I / II                       | Total                            | Weak                                     | Strong |
| 10Co/HZ5(15)  | 330/530             | 511/550                           | 34                               | 37                                       | 47     |
| 10Co/HZ5(40)  | 295/515             | 558/1590                          | 69                               | 20                                       | 42     |
| 10Co/HZ5(80)  | 280/488             | 660/2036                          | 87                               | 12                                       | 40     |
| 10Co/HZ5(150) | 265/354             | 525/1314                          | 59                               | 10                                       | 23     |
| 10Co/S-1      | 248/323             | 398/1612                          | 65                               | 1                                        | 4      |

<sup>a</sup> On the basis of total H<sub>2</sub> consumption for complete reduction of Co<sub>3</sub>O<sub>4</sub> to Co<sup>0</sup>.

**Table S12.** Reduction and acidic properties of Co/HZ5 (80) catalysts with different Co loading content.

| Samples      | H <sub>2</sub> -TPR |                                   |                                  | NH <sub>3</sub> -TPD                     |        |
|--------------|---------------------|-----------------------------------|----------------------------------|------------------------------------------|--------|
|              | Top temp.<br>(°C)   | H <sub>2</sub> uptake<br>(μmol/g) | Reducibility<br>(%) <sup>a</sup> | Acid strength<br>(μmol·g <sup>-1</sup> ) |        |
|              | Peak I / II         | Peak I / II                       | Total                            | Weak                                     | Strong |
| 5Co/HZ5(80)  | 255/420             | 160/790                           | 61                               | 61                                       | 68     |
| 10Co/HZ5(80) | 280/488             | 660/2036                          | 87                               | 12                                       | 40     |
| 20Co/HZ5(80) | 275/437             | 1302/4575                         | 95                               | 11                                       | 30     |
| 30Co/HZ5(80) | 273/410             | 1590/6645                         | 89                               | 10                                       | 26     |

<sup>a</sup> On the basis of total H<sub>2</sub> consumption for complete reduction of Co<sub>3</sub>O<sub>4</sub> to Co<sup>0</sup>.

**Table S13.** Acidity properties of HZ5 (80) zeolite and 10Co/HZ5 (80) catalyst.

| Samples      | Acid strength (μmol·g <sup>-1</sup> ) <sup>a</sup> |        | Acid type (μmol·g <sup>-1</sup> ) <sup>b</sup> |          |
|--------------|----------------------------------------------------|--------|------------------------------------------------|----------|
|              | Weak                                               | Strong | Lewis                                          | Brönsted |
| HZ5(80)      | 12                                                 | 35     | 4                                              | 41       |
| 10Co/HZ5(80) | 12                                                 | 40     | 19                                             | 28       |

<sup>a</sup> Determined by NH<sub>3</sub>-TPD. <sup>b</sup> Determined by Py-IR.
